# Supplementary material for: Occipital Alpha Activity during Stimulus Processing Gates the Information Flow to Object-Selective Cortex
Source: PubMed Central journal article supplement (PMC4205112; doi:10.1371/journal.pbio.1001965), 2014-10-21

BOLD Contrast per AAL region averaged over subjects

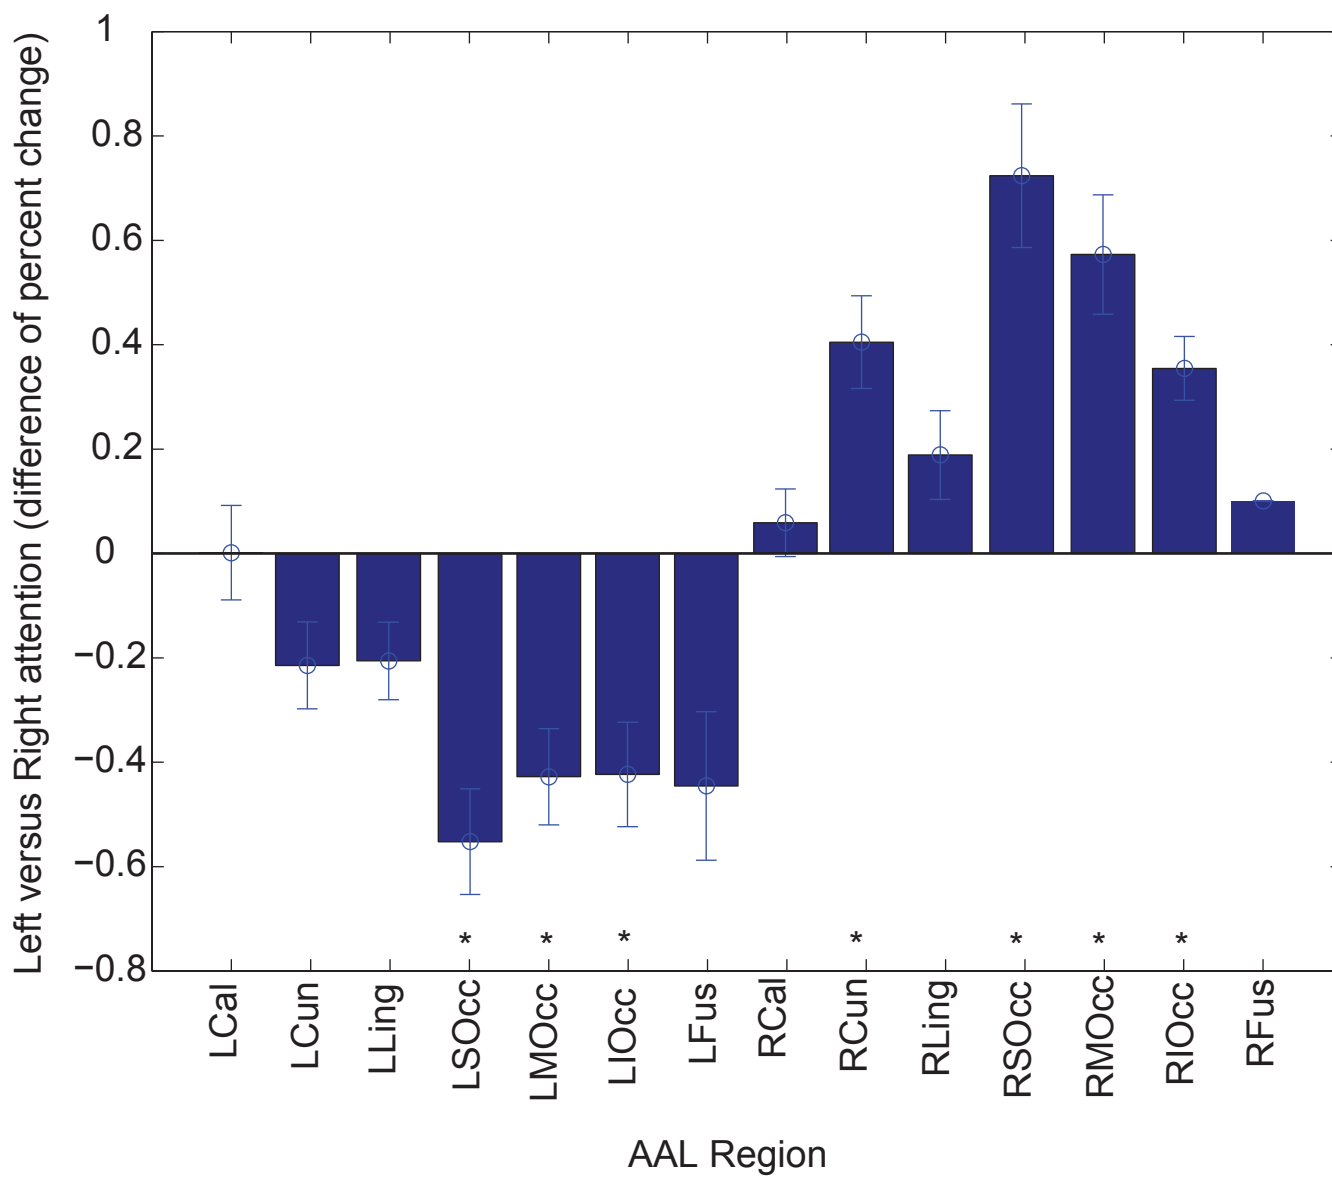

Supplement: pbio.1001965.s001.pdf [file pbio.1001965.s001.pdf]
