# Supplementary material for: Occipital Alpha Activity during Stimulus Processing Gates the Information Flow to Object-Selective Cortex
Source: PubMed Central journal article supplement (PMC4205112; doi:10.1371/journal.pbio.1001965), 2014-10-21

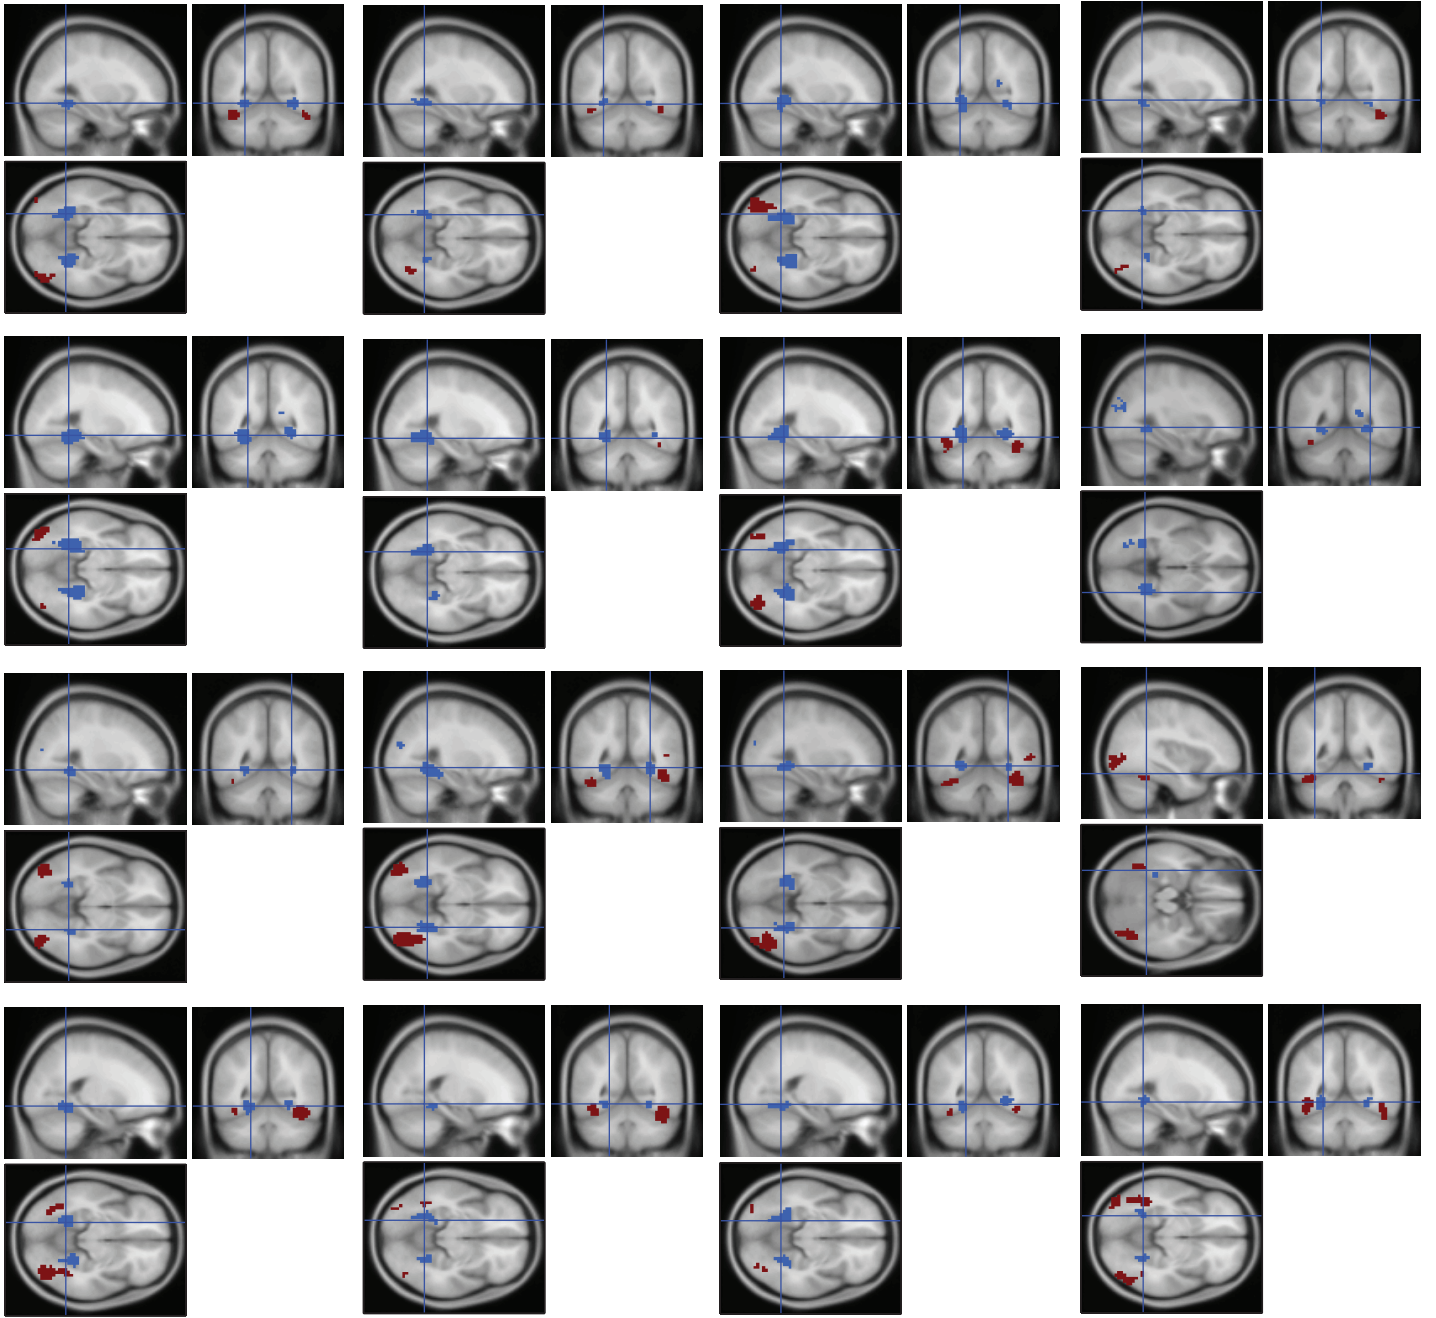

Supplement: pbio.1001965.s002.pdf [file pbio.1001965.s002.pdf]
